# Supplementary material for: Quantitative Determination of Alkaloids in Lotus Flower (Flower Buds of Nelumbo nucifera) and Their Melanogenesis Inhibitory Activity
Source: MDPI journal article supplement (doi:10.3390/molecules21070930), 2016-07-19
Supplement: s1 [file s1]

# Supplementary Materials: Quantitative Determination of Alkaloids in Lotus Flower (Flower Buds of *Nelumbo nucifera*) and Their Melanogenesis Inhibitory Activity

Toshio Morikawa, Niichiro Kitagawa, Genzoh Tanabe, Kiyofumi Ninomiya, Shuhei Okugawa, Chiaki Motai, Iyori Kamei, Masayuki Yoshikawa, I-Jung Lee <sup>5</sup> and Osamu Muraoka

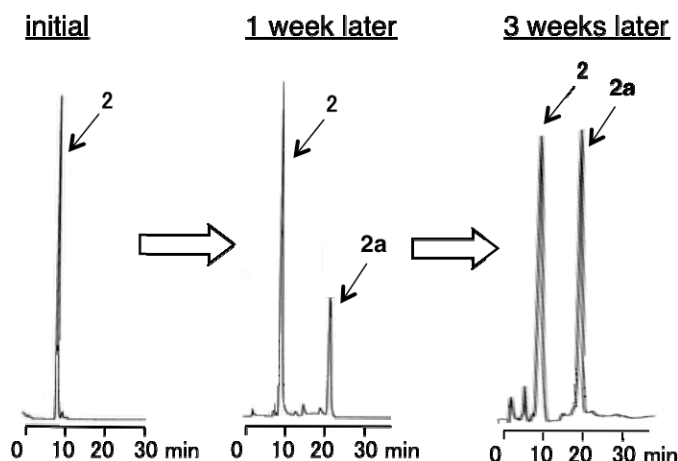

**Figure S1.** Monitoring for chemical transformation of 2 into its ammonium carbamate salt (2'') and to methyl carbamate (2a) by HPLC analysis.

**Table S1.** Contents of alkaloids (1–10) in the methanol extracts from the leaf, fruit, and embryo parts of *N. nucifera*.

| Sample No. | Part   | Loss of Drying<br><sup>a</sup> (%) | Extraction<br>Yield <sup>b</sup> (%) | Contents (mg/g in Dry Material) |                   |                   |                   |                   |                    |
|------------|--------|------------------------------------|--------------------------------------|---------------------------------|-------------------|-------------------|-------------------|-------------------|--------------------|
|            |        |                                    |                                      | 1                               | 2                 | 3                 | 4                 | 5                 |                    |
| NN-9       | Leaf   | 9.8                                | 19.0                                 | 0.24                            | 0.05              | 0.38              | 0.14              | n.d. <sup>c</sup> |                    |
| NN-10      | Fruit  | 10.9                               | 10.9                                 | n.d. <sup>c</sup>               | n.d. <sup>c</sup> | n.d. <sup>c</sup> | n.d. <sup>c</sup> | n.d. <sup>c</sup> |                    |
| NN-11      | Fruit  | 9.3                                | 10.0                                 | n.d. <sup>c</sup>               | n.d. <sup>c</sup> | n.d. <sup>c</sup> | n.d. <sup>c</sup> | n.d. <sup>c</sup> |                    |
| NN-12      | Embryo | 8.4                                | 32.8                                 | 0.02                            | n.d. <sup>c</sup> | n.d. <sup>c</sup> | n.d. <sup>c</sup> | n.d. <sup>c</sup> |                    |
|            |        |                                    |                                      | Contents (mg/g in dry material) |                   |                   |                   |                   |                    |
|            |        |                                    |                                      | 6                               | 7                 | 8                 | 9                 | 10                | Total <sup>a</sup> |
|            |        |                                    |                                      | 0.16                            | 0.25              | 0.16              | n.d. <sup>c</sup> | 0.07              | 1.20               |
|            |        |                                    |                                      | n.d. <sup>c</sup>               | n.d. <sup>c</sup> | n.d. <sup>c</sup> | n.d. <sup>c</sup> | n.d. <sup>c</sup> | n.d. <sup>c</sup>  |
|            |        |                                    |                                      | n.d. <sup>c</sup>               | n.d. <sup>c</sup> | n.d. <sup>c</sup> | n.d. <sup>c</sup> | n.d. <sup>c</sup> | n.d. <sup>c</sup>  |
|            |        |                                    |                                      | 0.25                            | n.d. <sup>c</sup> | 0.20              | n.d. <sup>c</sup> | 0.17              | 0.64               |

<sup>a</sup> Each powdered sample was dried at 105°C for 8 h; <sup>b</sup> each powdered sample was extracted two times with methanol under reflux for 120 min and <sup>c</sup> less than the quantitation limit.

**Table S2.** Contents of alkaloids (1–10) in the methanol extracts from the leaf (NN-9), fruit (NN-10 and 11), and embryo (NN-12) of *N. nucifera*.

| Sample No. | Inhibition (%)              |                              |                               |                               |                                 | IC <sub>50</sub> (µg/mL) |
|------------|-----------------------------|------------------------------|-------------------------------|-------------------------------|---------------------------------|--------------------------|
|            | 0 µg/mL                     | 3 µg/mL                      | 10 µg/mL                      | 30 µg/mL                      | 100 µg/mL                       |                          |
| NN-9       | 0.0 ± 4.9<br>(100.0 ± 3.4)  | 15.0 ± 5.7<br>(66.2 ± 2.6 #) | 7.6 ± 6.3<br>(58.8 ± 1.9 #)   | 15.6 ± 8.0<br>(51.7 ± 3.1 #)  | —<br>(39.5 ± 1.7 #)             | >100                     |
| NN-10      | 0.0 ± 3.6<br>(100.0 ± 4.9)  | 22.7 ± 9.2<br>(112.2 ± 3.2)  | 8.4 ± 4.8<br>(103.9 ± 4.9)    | 17.5 ± 5.6<br>(119.7 ± 3.8)   | 11.6 ± 1.5<br>(126.8 ± 4.9)     | >100                     |
| NN-11      | 0.0 ± 7.6<br>(100.0 ± 2.1)  | 11.9 ± 6.8<br>(99.3 ± 2.8)   | 2.8 ± 4.1<br>(92.2 ± 5.9)     | 22.8 ± 4.9<br>(102.8 ± 2.2)   | 42.8 ± 4.8 **<br>(113.2 ± 6.9)  | >100                     |
| NN-12      | 0.0 ± 10.9<br>(100.0 ± 5.9) | 30.8 ± 15.4<br>(107.8 ± 5.0) | 88.0 ± 5.0 **<br>(95.5 ± 5.8) | 92.9 ± 2.8 **<br>(84.8 ± 4.5) | 71.6 ± 1.9 **<br>(56.2 ± 2.7 #) | 4.5                      |

Each value represents the mean ± S.E.M. ( $n = 4$ ); asterisks denote significant differences from the control group, \*\*  $p < 0.01$ .; #cytotoxic effects were observed, and values in parentheses indicate cell viability (%) in MTT assay.
